# Supplementary material for: Advancing CH4/H2 separation with covalent organic frameworks by combining molecular simulations and machine learning
Source: Royal Society of Chemistry journal article supplement (doi:10.1039/d3ta02433d), 2023-01-01
Supplement: d3ta02433d1.pdf [file d3ta02433d1.pdf]

**Supporting Information**

*for*

**Advancing CH<sub>4</sub>/H<sub>2</sub> Separation with Covalent Organic Frameworks by Combining  
Molecular Simulations and Machine Learning**

Gokhan Onder Aksu, Seda Keskin\*

Department of Chemical and Biological Engineering, Koc University, Rumelifeneri Yolu, Sariyer, 34450,  
Istanbul, Turkey

Submitted to *Journal of Materials Chemistry A*

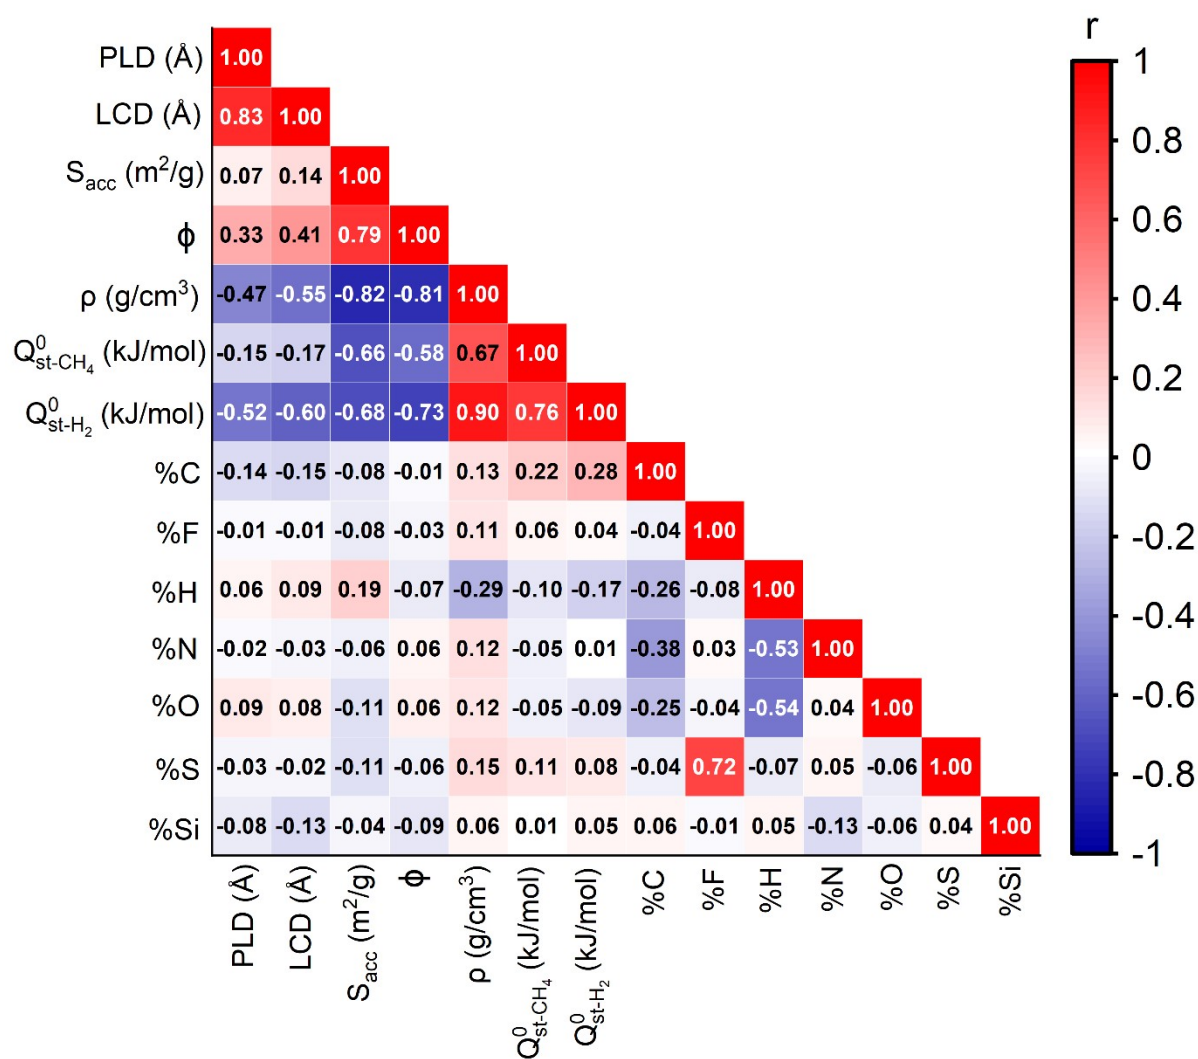

**Figure S1.** Correlation matrix for structural and chemical descriptors of 7,737 hypoCOFs. Pearson coefficients ( $r$ ) are provided for the relationship between each descriptor.

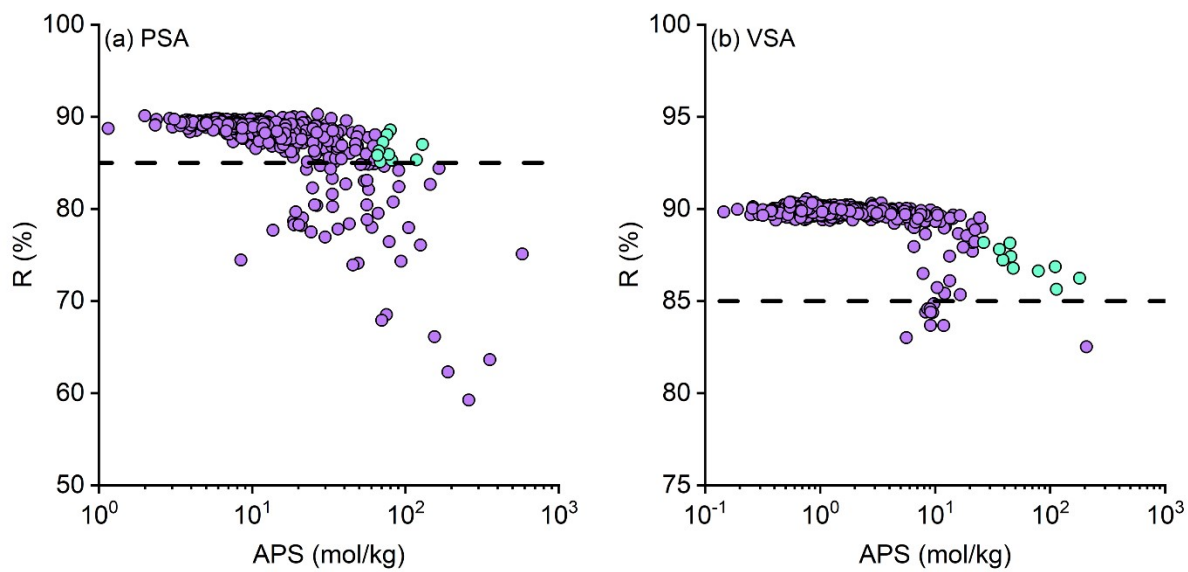

**Figure S2.** R% and APS of 597 CoRE COFs computed for  $\text{CH}_4/\text{H}_2$ :50/50 separation at (a) PSA and (b) VSA conditions.

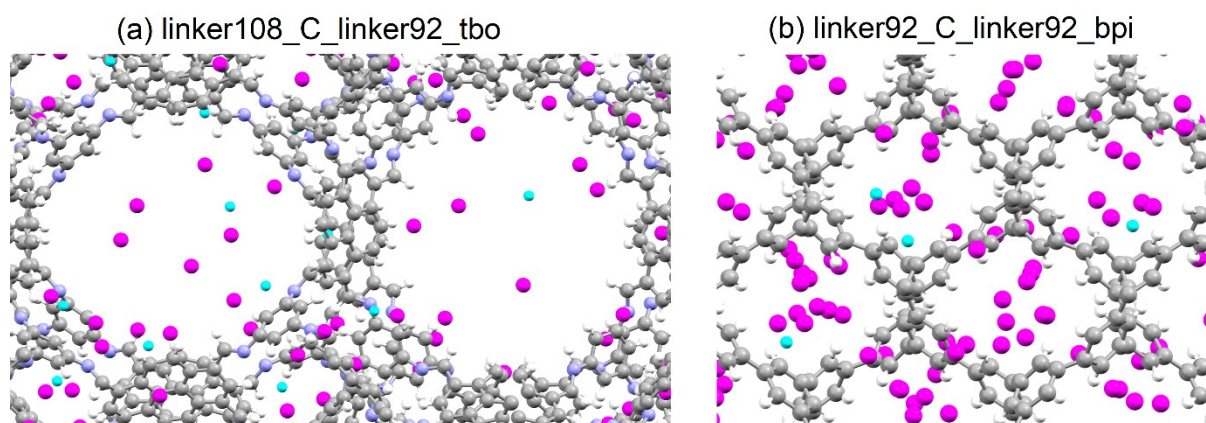

**Figure S3.** The snapshot showing the adsorption of the gas mixture in the best hypoCOFs identified at (a) PSA, (b) VSA processes at 10 bar, 298 K.  $\text{CH}_4$  and  $\text{H}_2$  molecules were denoted as magenta and cyan spheres, respectively. Grey and white, and light blue colored spheres represent C, H and N atoms in the framework.

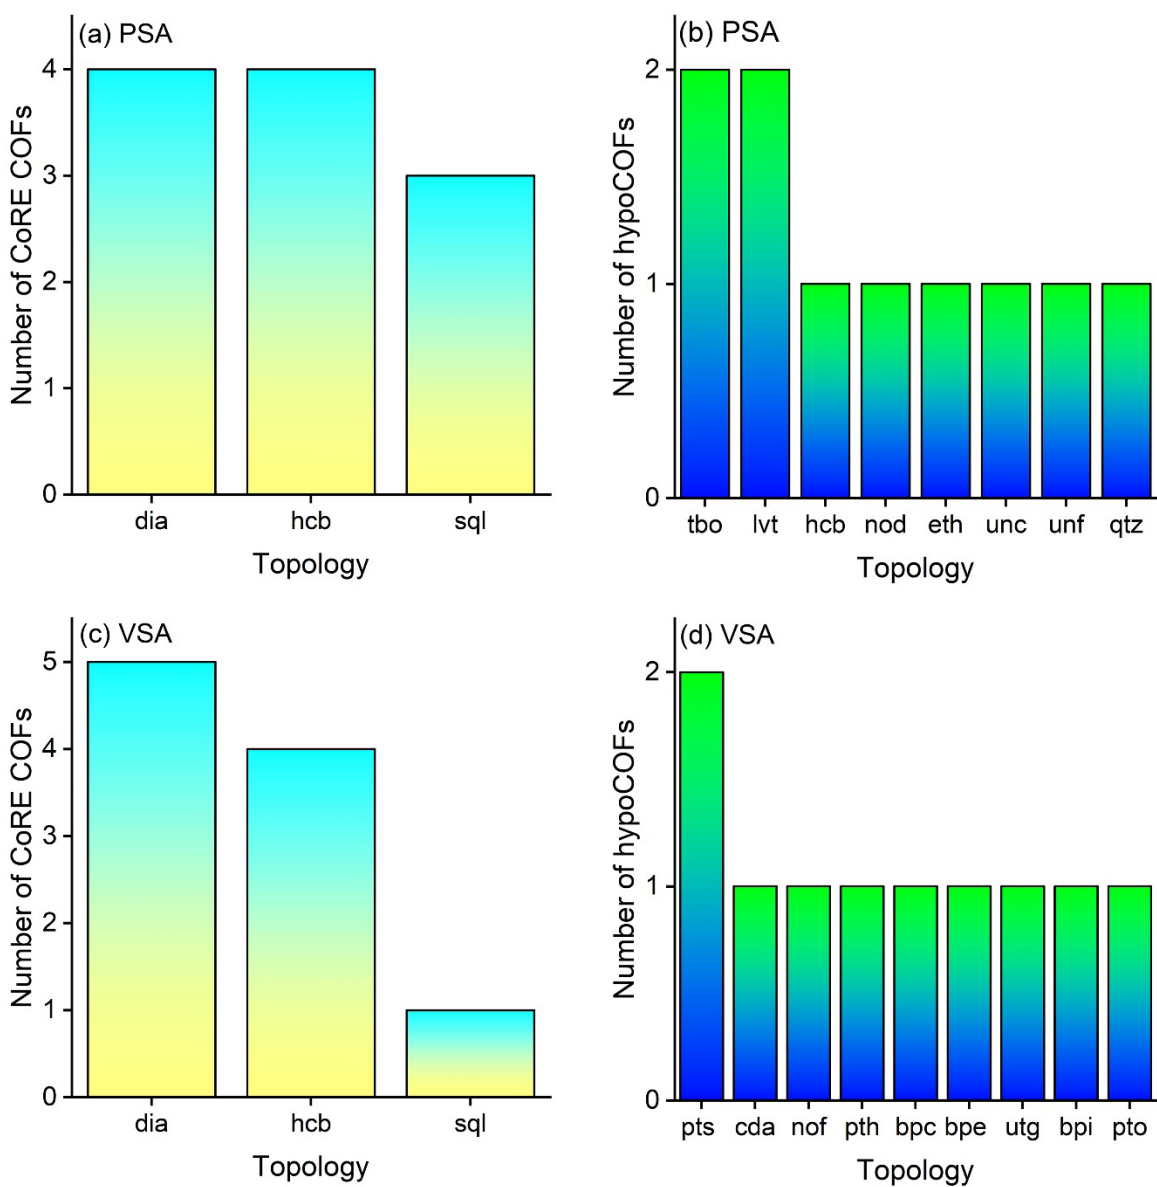

**Figure S4.** The topology distributions among the top 10 CoRE COFs and the top 10 hypoCOFs for CH<sub>4</sub>/H<sub>2</sub> separation at (a-b) PSA and (c-d) VSA conditions.

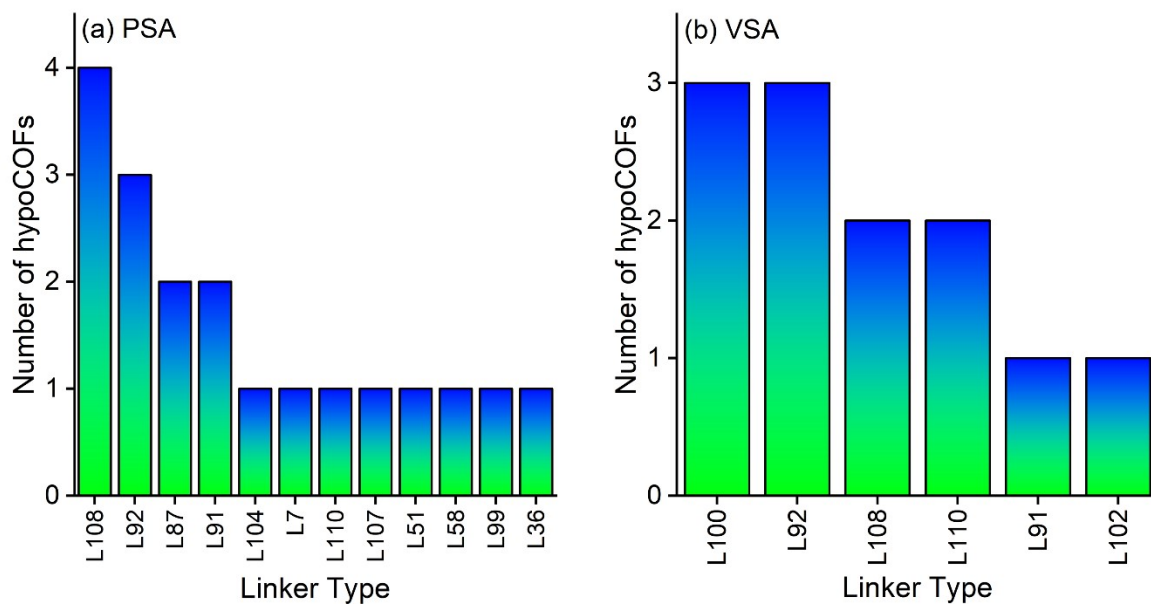

**Figure S5.** The distribution of linker types among the top 10 hypoCOFs for CH<sub>4</sub>/H<sub>2</sub> separation at (a) PSA and (b) VSA conditions.

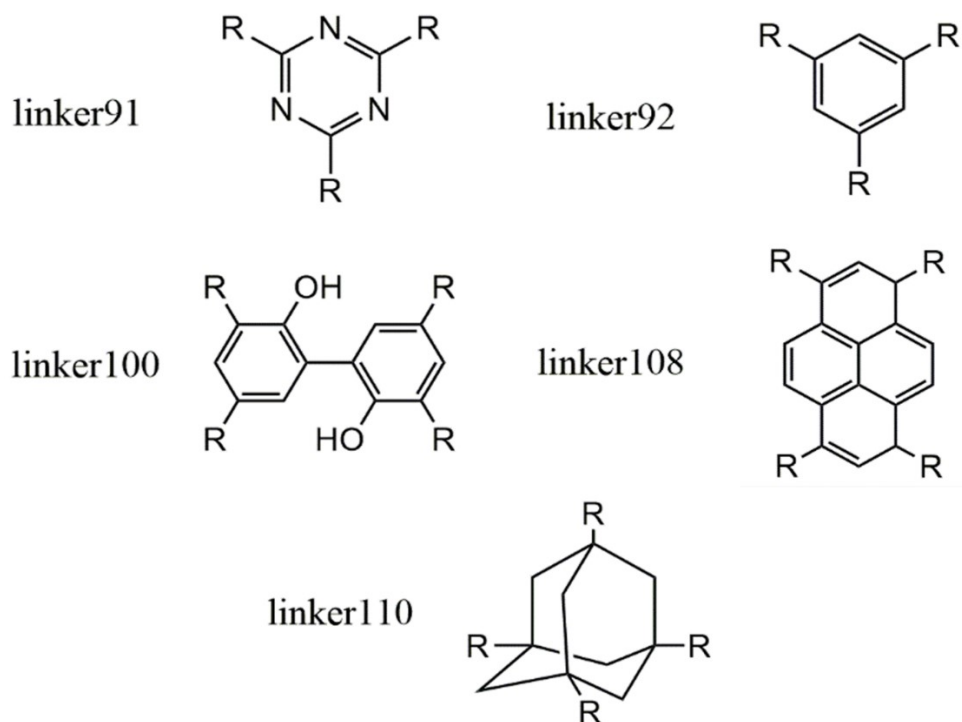

**Figure S6.** The schematic representations of the most frequent linkers found in top hypoCOFs. R represents the repeating unit of monomers.

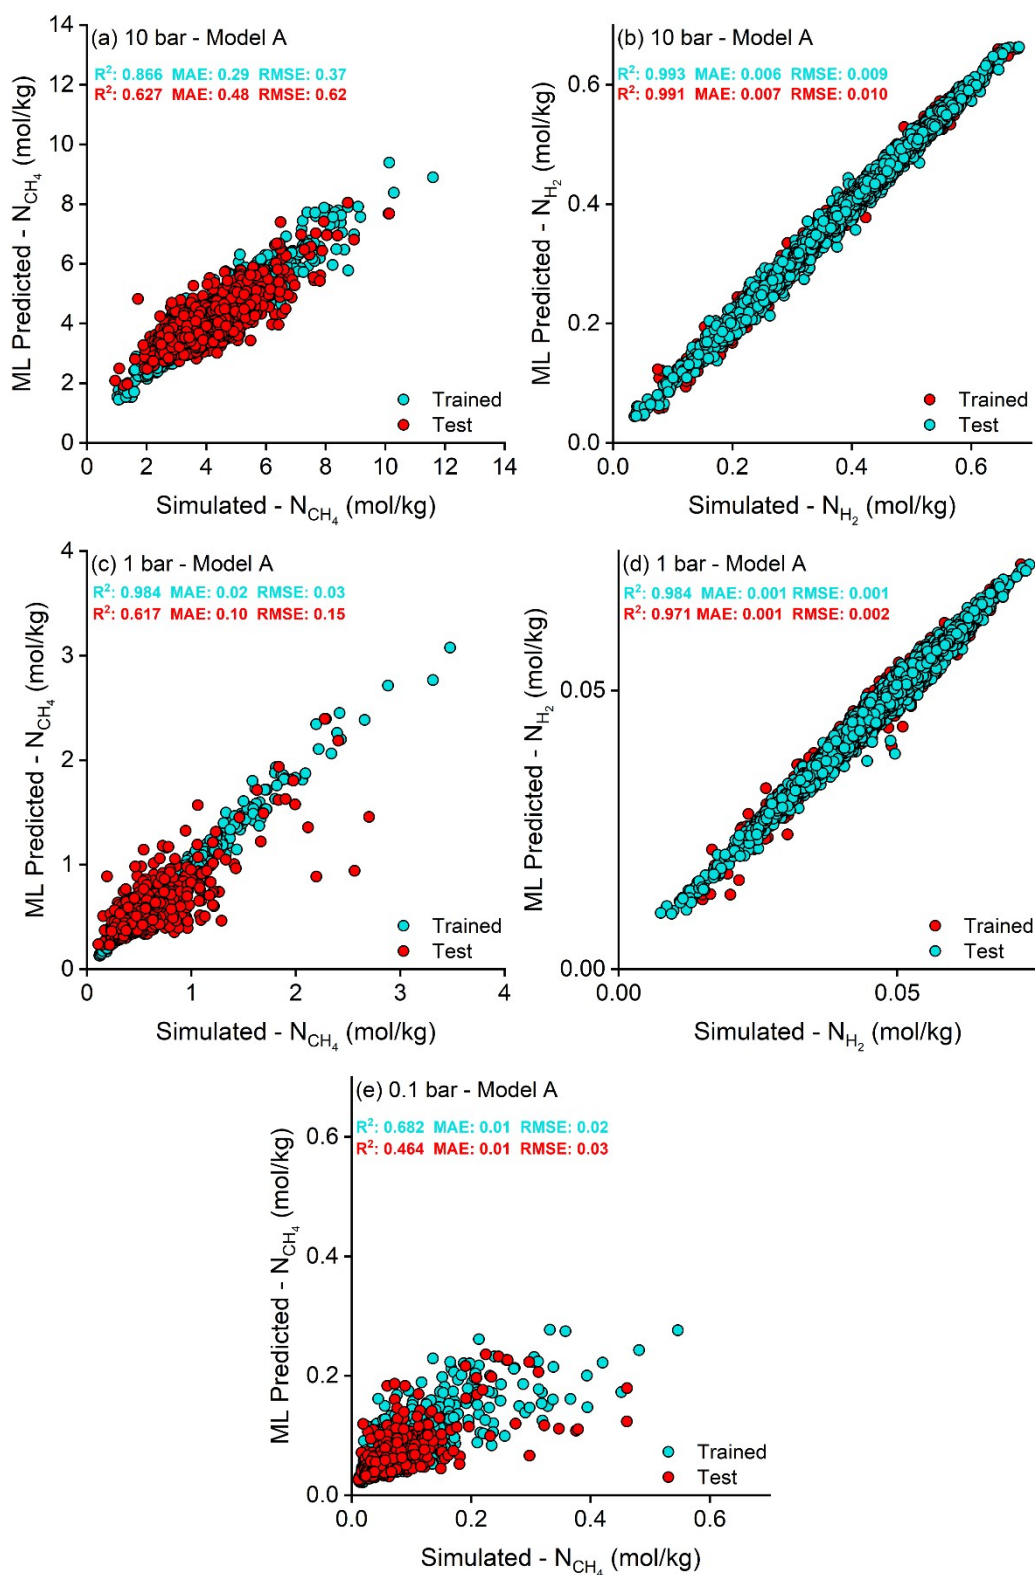

**Figure S7.** Comparison of CH<sub>4</sub> and H<sub>2</sub> uptakes predicted by ML models constructed with Group A descriptors and simulated uptakes in 7,737 hypoCOFs at (a-b) 10 bar, (c-d) 1 bar. Data at 0.1 bar is produced only for CH<sub>4</sub> for calculating the CH<sub>4</sub> working capacity at VSA condition and given in (e). Blue (red) symbols represent the training (test) data.



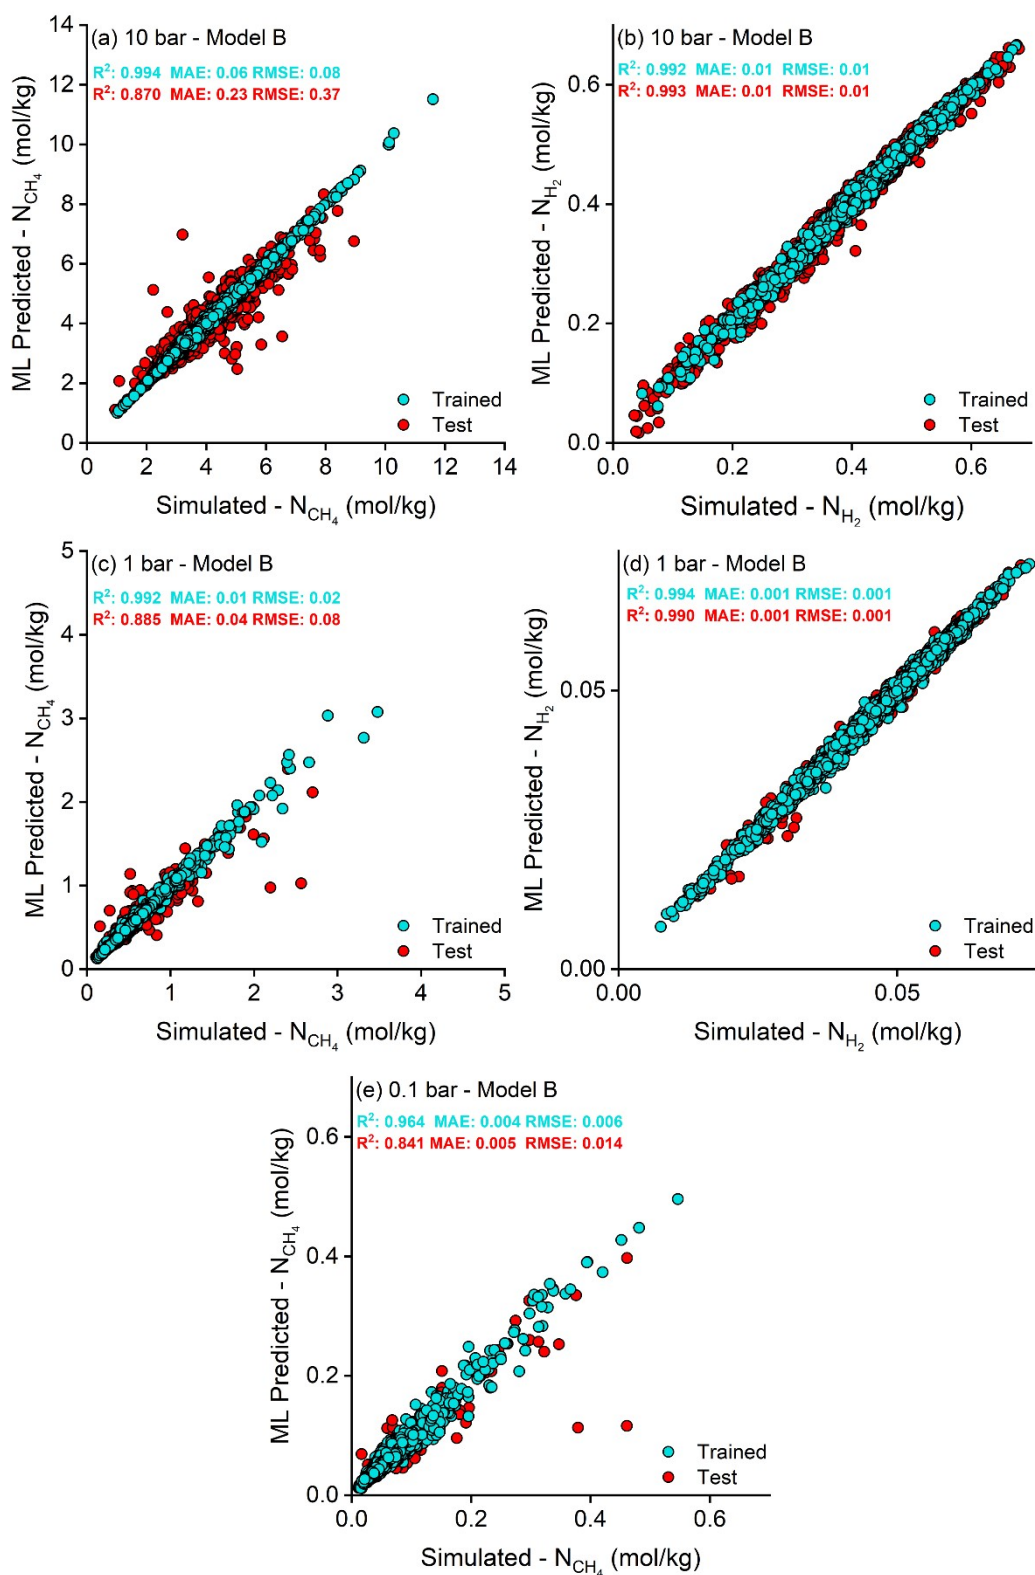

**Figure S8.** Comparison of CH<sub>4</sub> and H<sub>2</sub> uptakes predicted by ML models constructed with Group B descriptors and simulated uptakes in 7,737 hypoCOFs at (a-b) 10 bar, (c-d) 1 bar. Data at 0.1 bar is produced only for CH<sub>4</sub> for calculating the CH<sub>4</sub> working capacity at VSA condition and given in (e). Blue (red) symbols represent the training (test) data.

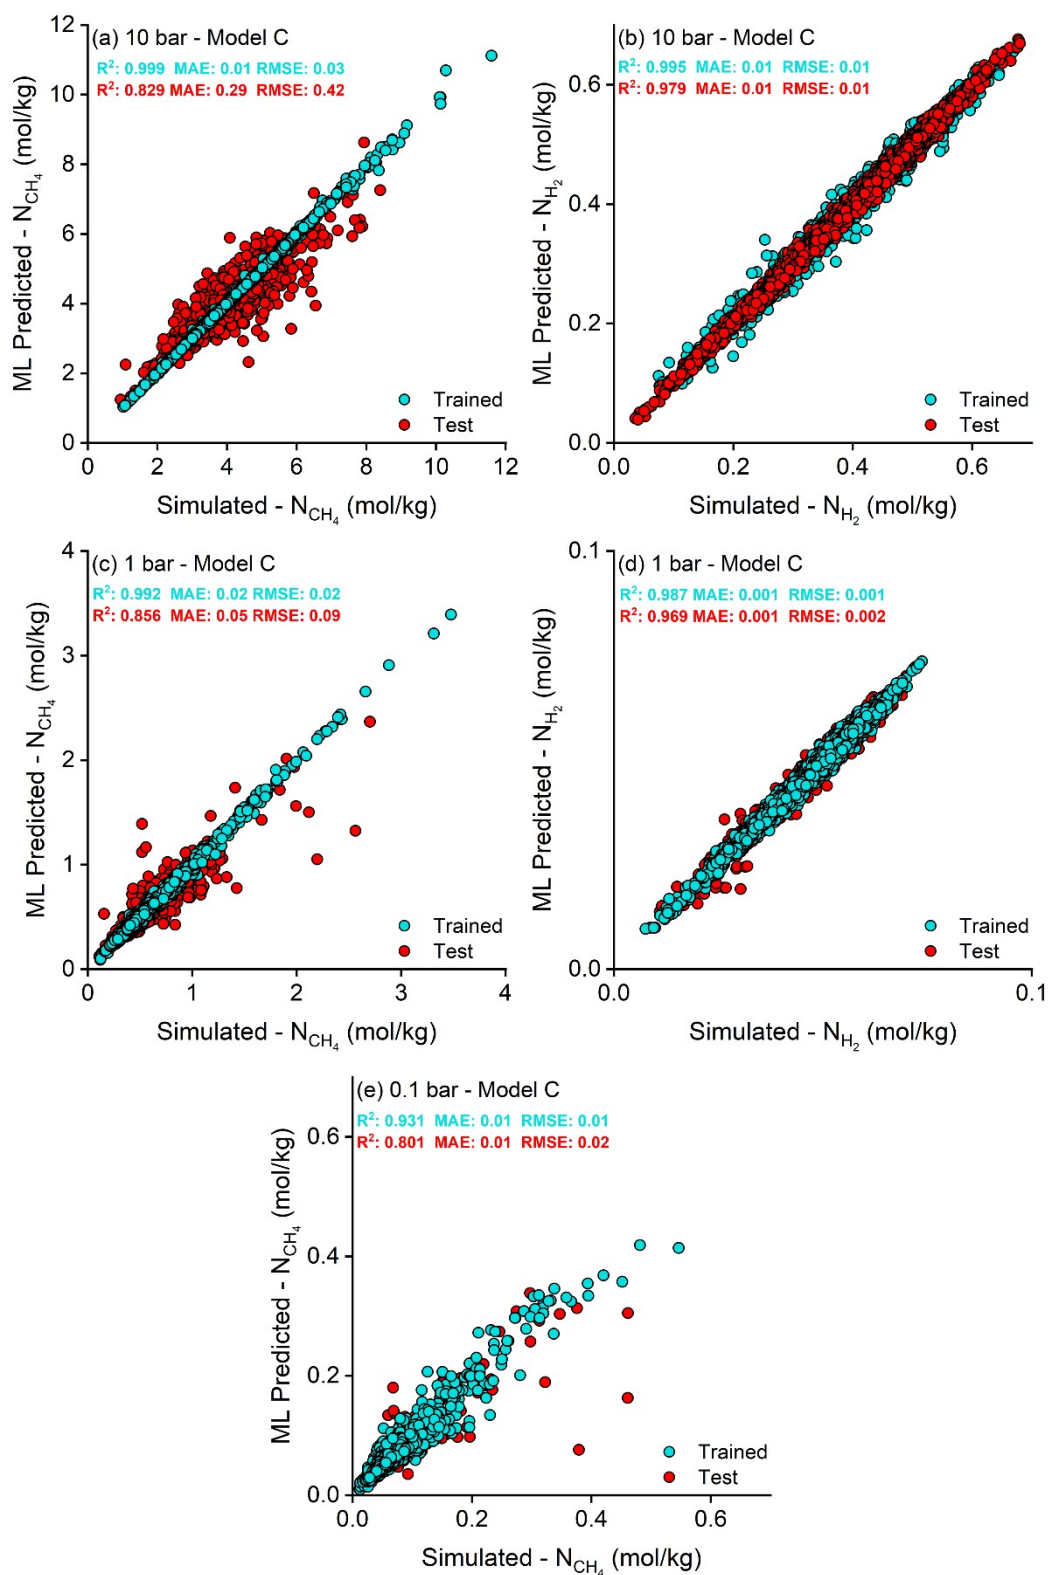

**Figure S9.** Comparison of CH<sub>4</sub> and H<sub>2</sub> uptakes predicted by ML models constructed with Group C descriptors and simulated uptakes in 7,737 hypoCOFs at (a-b) 10 bar, (c-d) 1 bar. Data at 0.1 bar is produced only for CH<sub>4</sub> for calculating the CH<sub>4</sub> working capacity at VSA condition and given in (e). Blue (red) symbols represent the training (test) data.

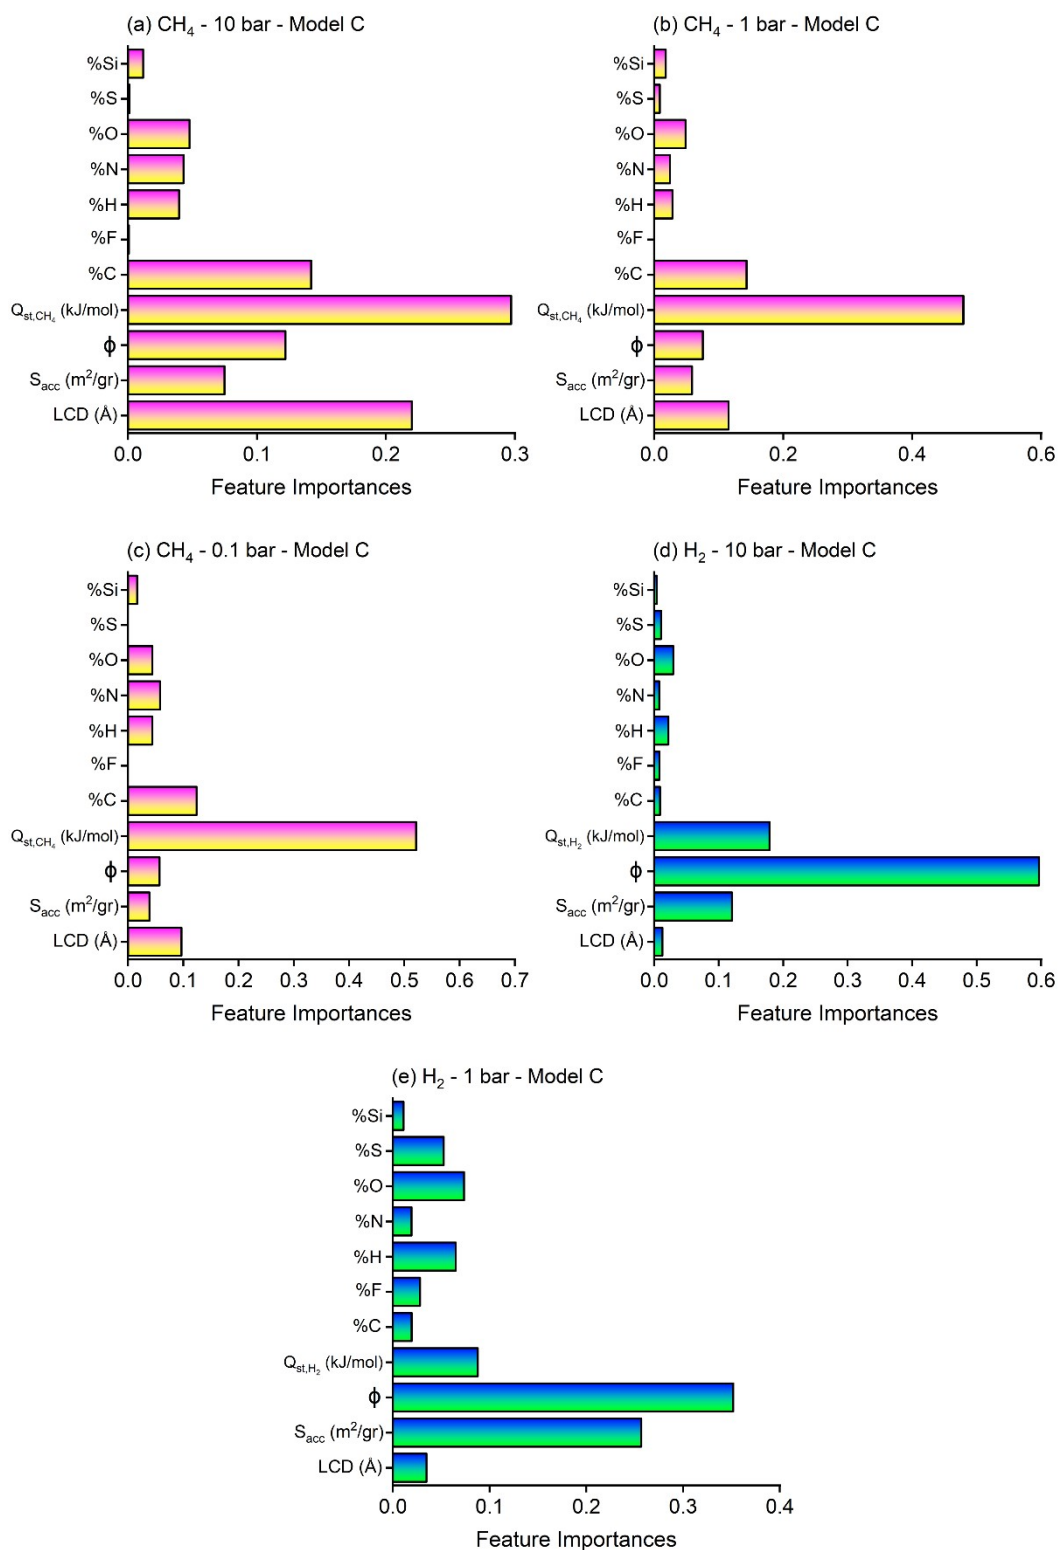

**Figure S10.** Feature importance distributions for Group C models used in predicting (a-c) CH<sub>4</sub> and (d,e) H<sub>2</sub> adsorption properties in 7,737 hypoCOFs at 0.1, 1, and 10 bar, 298 K.

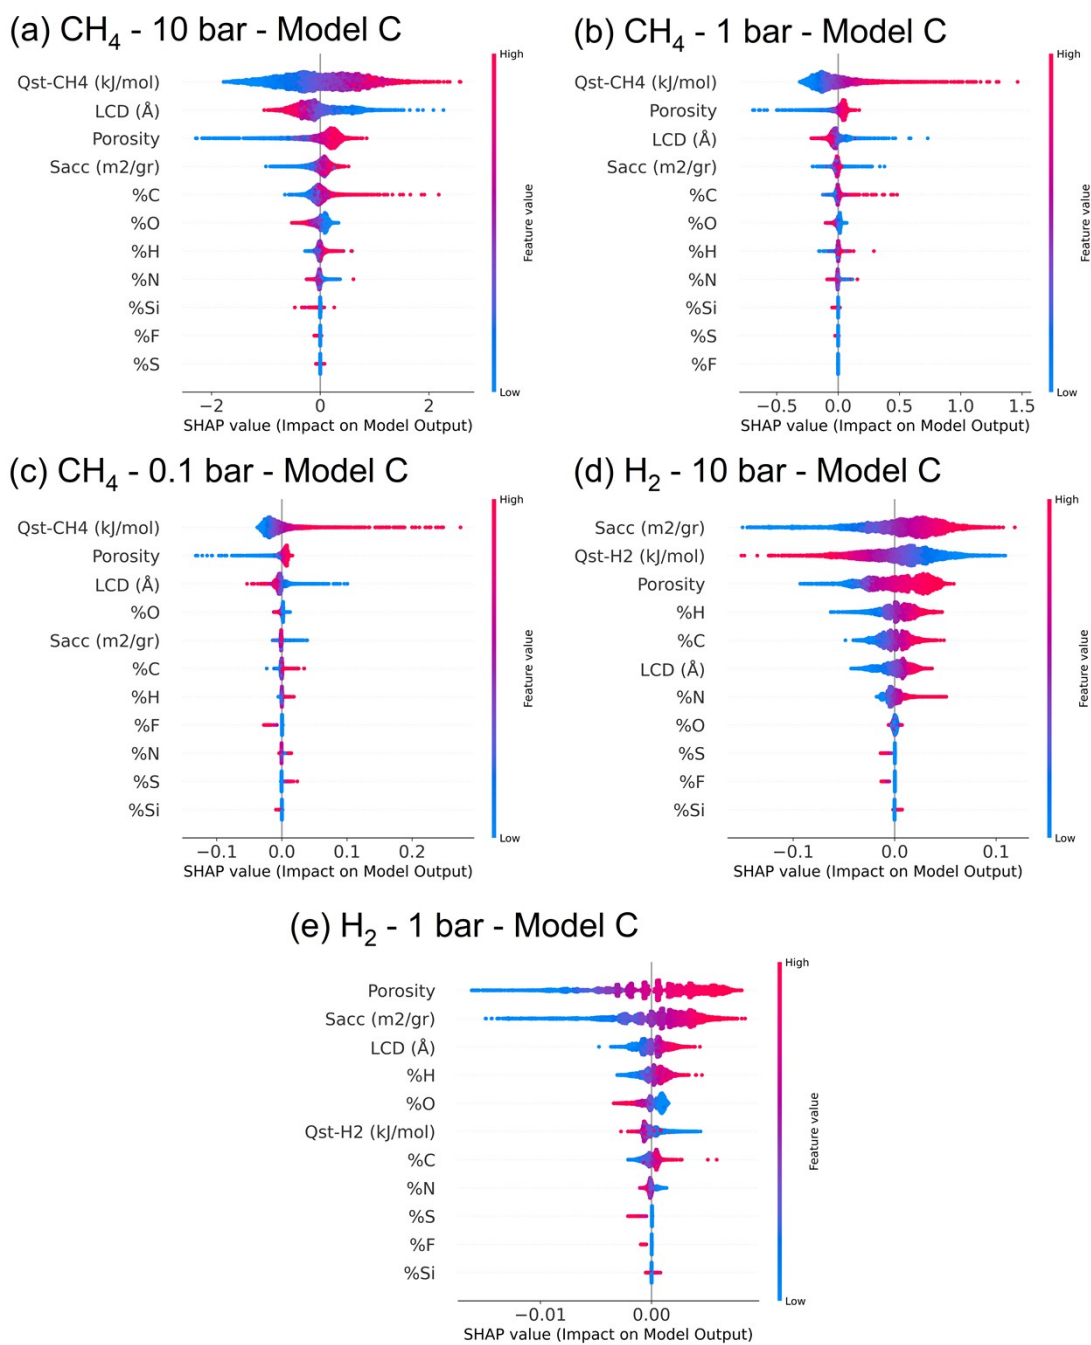

**Figure S11.** SHAP feature importance distributions for Group C models used in predicting CH<sub>4</sub> adsorption properties at (a) 10 bar, (b) 1 bar, (c) 0.1 bar, 298 K and H<sub>2</sub> adsorption properties at (d) 10 bar, (e) 1 bar, 298 K. Features are sorted by their corresponding importances calculated by SHAP from top to bottom in descending order.

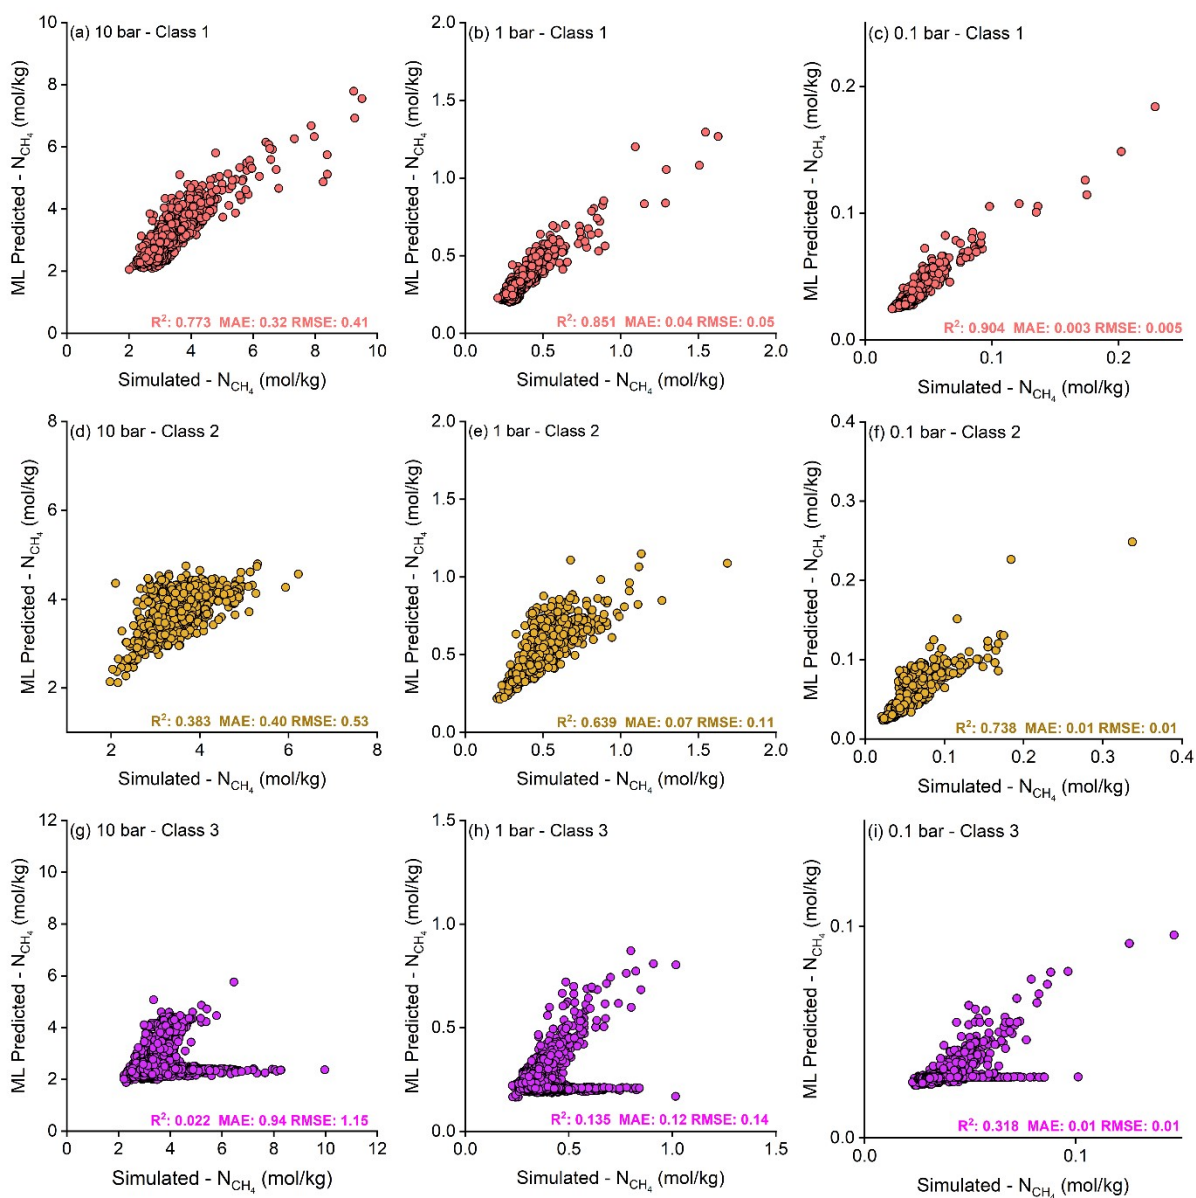

**Figure S12.** Comparison of  $\text{CH}_4$  uptake data of unseen hypoCOFs predicted by Group C models at (a, d, g) 10, (b, e, h) 1, and (c, f, i) 0.1 bar.

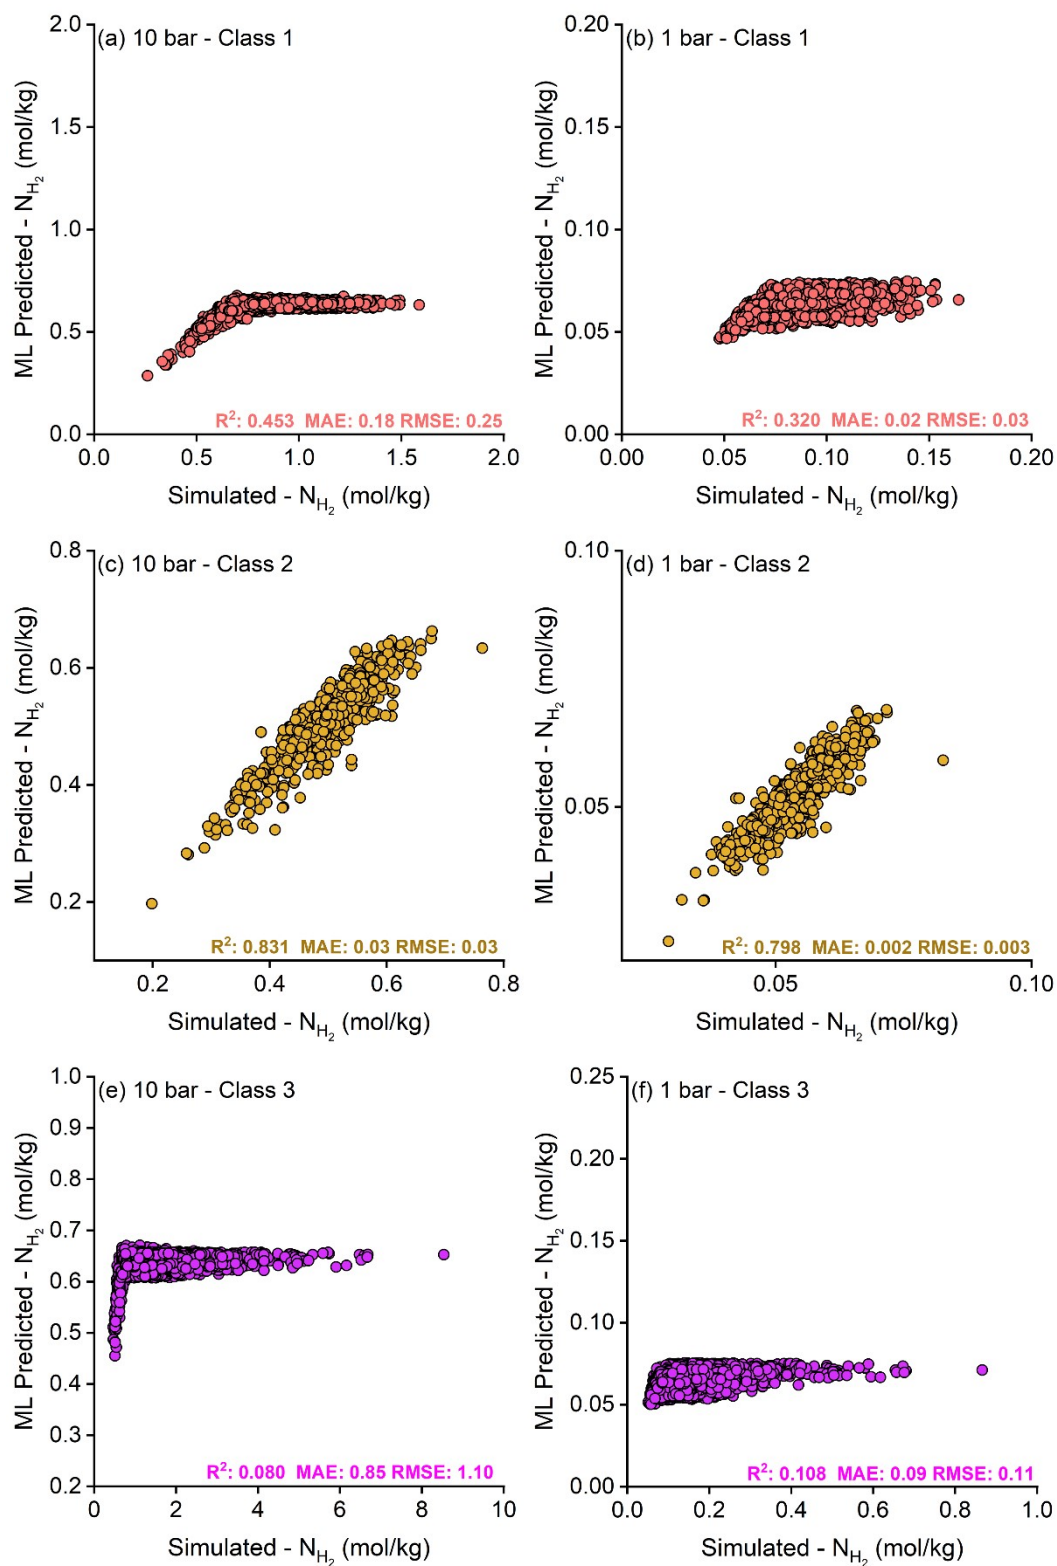

**Figure S13.** Comparison of  $H_2$  uptake data of unseen hypoCOFs predicted by Group C models at (a, c, e) 10 bar and (b, d, f) 1 bar.

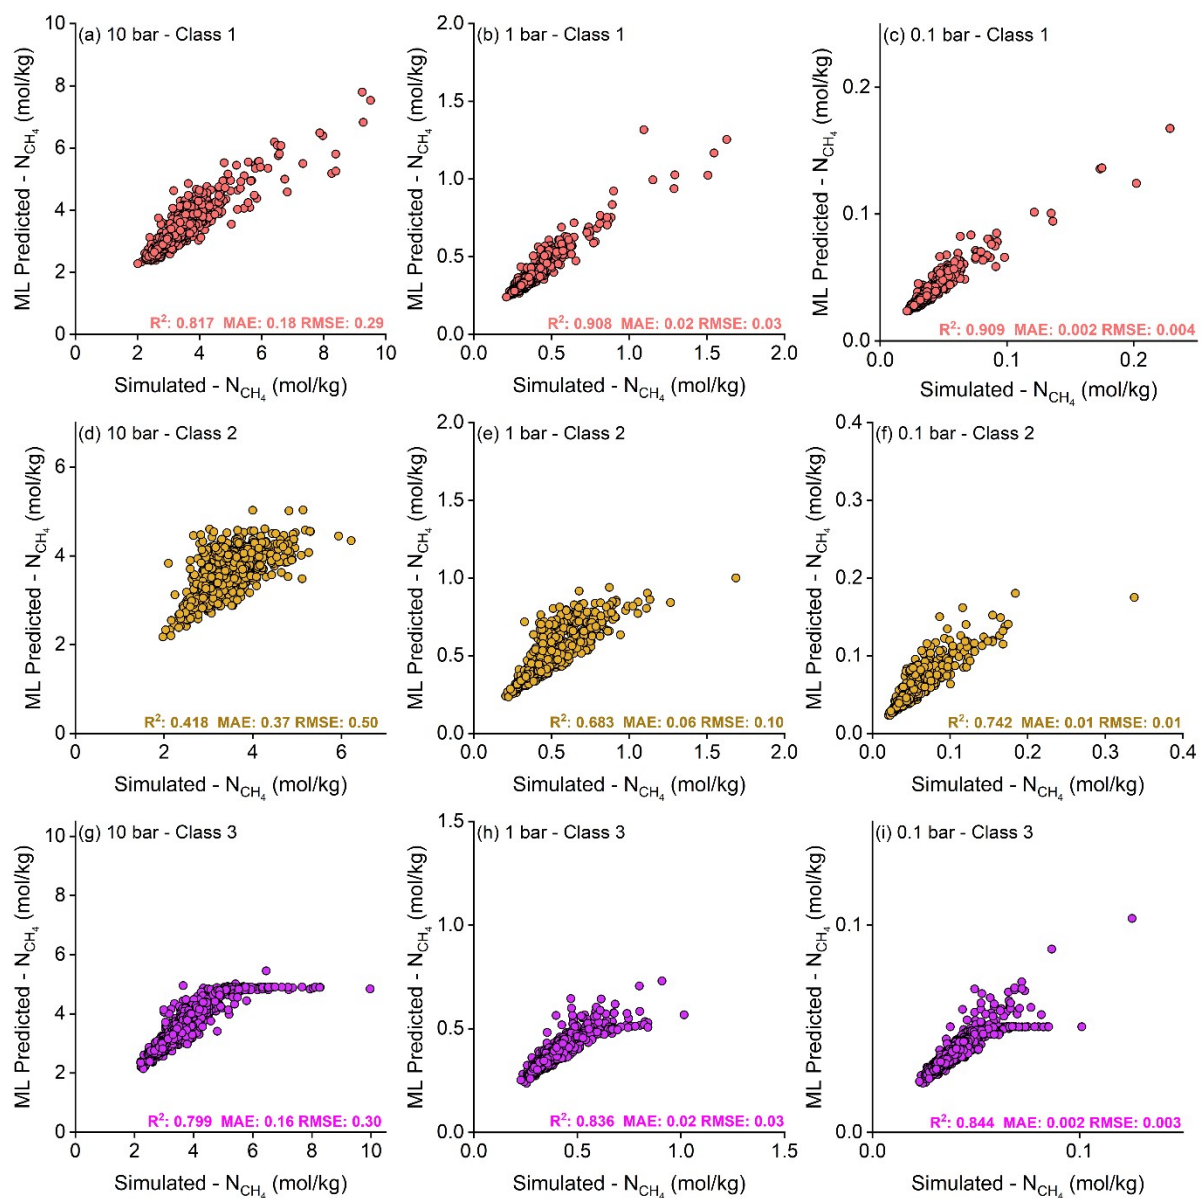

**Figure S14.** Comparison of  $CH_4$  uptake data of unseen hypoCOFs predicted by extended Group C models at (a, d, g) 10, (b, e, h) 1, and (c, f, i) 0.1 bar.

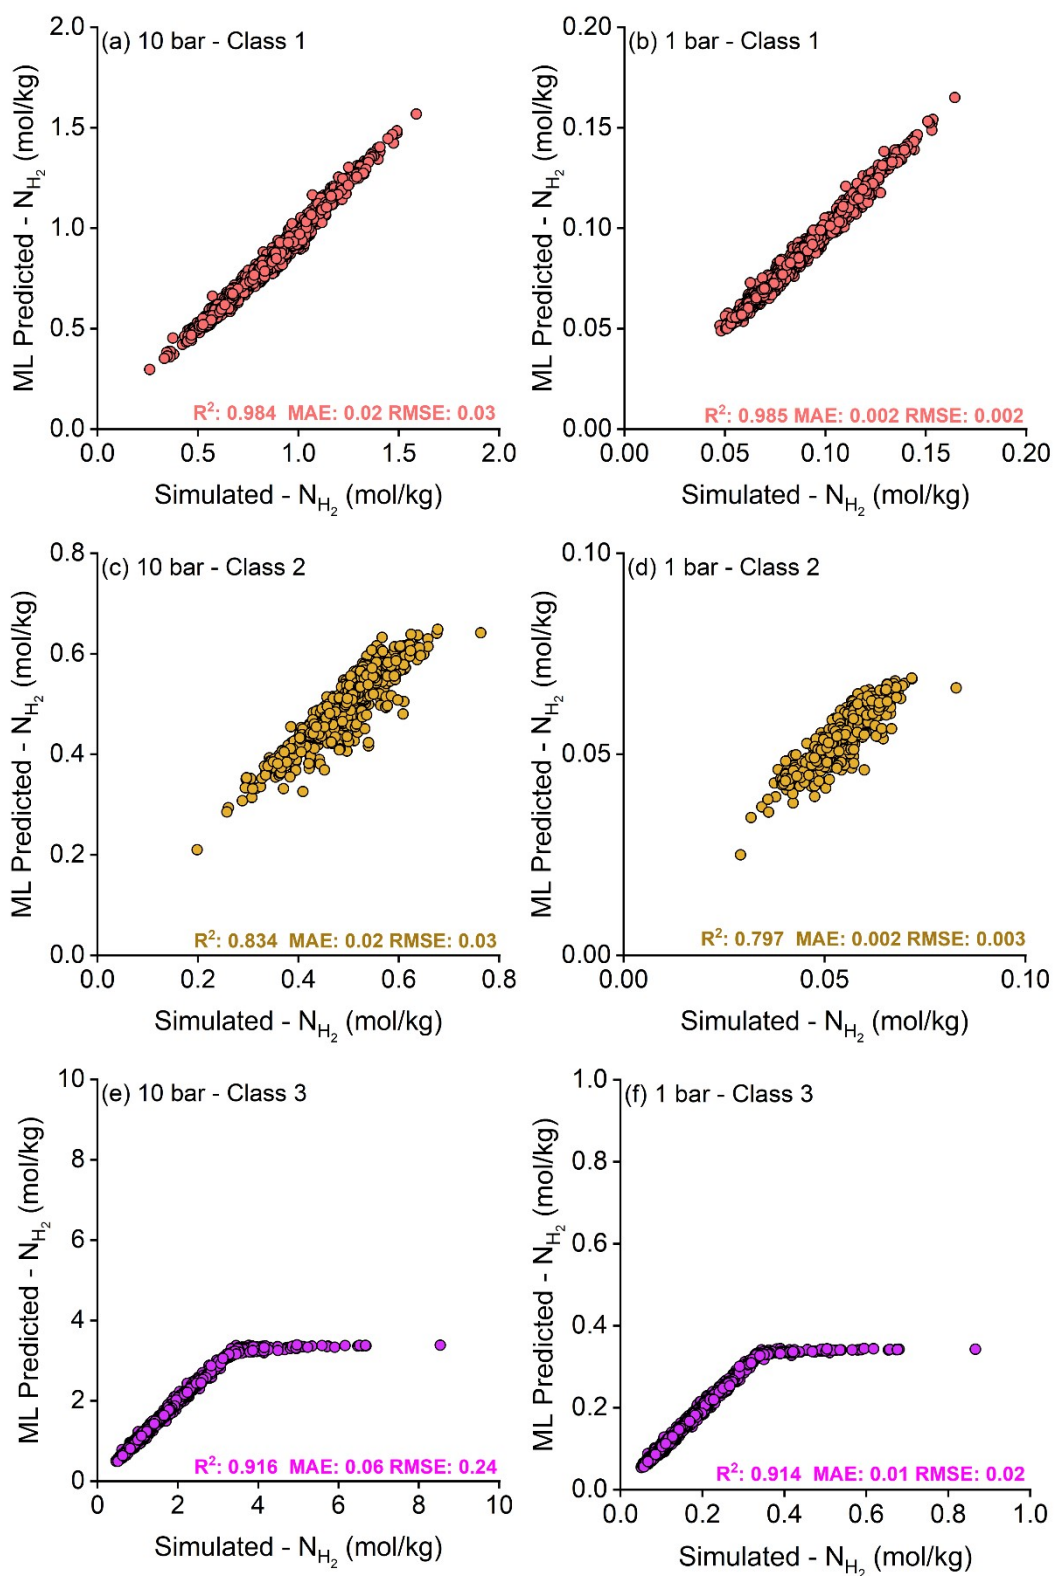

**Figure S15.** Comparison of  $H_2$  uptake data of unseen hypoCOFs predicted by extended Group C models at (a, c, e) 10 bar, and (b, d, f) 1 bar.



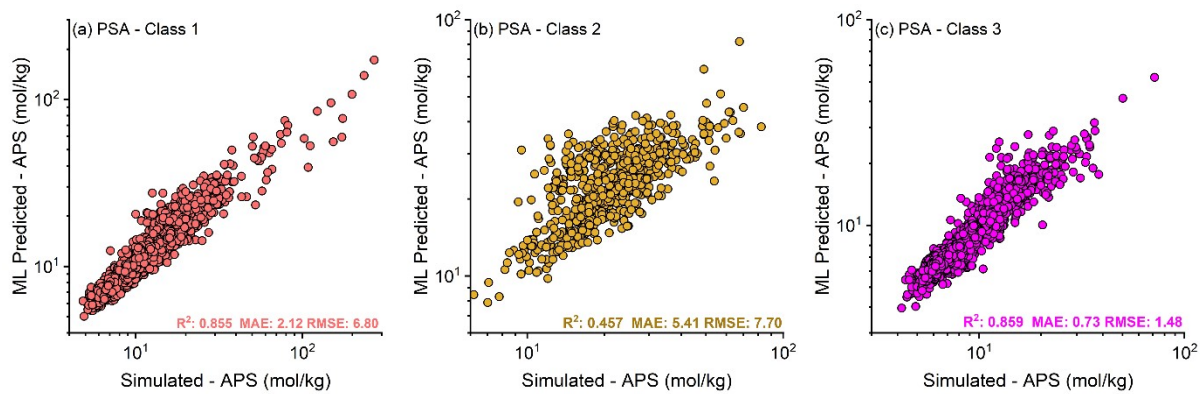

**Figure S16.** ML-predicted and simulated APSs for unseen hypoCOFs at PSA condition.

**Table S1.** Performance metrics computed to evaluate CoRE COF and hypoCOF adsorbents.

| <b>Metric</b>                               | <b>Formula</b>                                                                                       |
|---------------------------------------------|------------------------------------------------------------------------------------------------------|
| <b>Mixture adsorption selectivity</b>       | $S_{\text{CH}_4/\text{H}_2} = \frac{N_{\text{CH}_4} y_{\text{CH}_4}}{N_{\text{H}_2} y_{\text{H}_2}}$ |
| <b>Working capacity (mol/kg)</b>            | $\Delta N_{\text{CH}_4} = N_{\text{ads,CH}_4} - N_{\text{des,CH}_4}$                                 |
| <b>Adsorbent performance score (mol/kg)</b> | $\text{APS} = S_{\text{CH}_4/\text{H}_2} \times \Delta N_{\text{CH}_4}$                              |
| <b>Percent regenerability</b>               | $\text{R}\% = \frac{\Delta N_{\text{CH}_4}}{N_{\text{ads,CH}_4}} \times 100\%$                       |

$N_{\text{ads},i}$ : gas uptake at adsorption condition (mol/kg),  $N_{\text{des},i}$ : gas uptake at desorption condition (mol/kg),  $y_i$ : bulk composition of the gas mixture

**Table S2.** The list of descriptors to construct machine learning models.

| <b>Group A</b>                                                | <b>Group B</b>                                                | <b>Group C</b>                                                |
|---------------------------------------------------------------|---------------------------------------------------------------|---------------------------------------------------------------|
| Largest Cavity Diameter (Å), LCD                              | Largest Cavity Diameter (Å), LCD                              | Largest Cavity Diameter (Å), LCD                              |
| Pore limiting diameter (Å), PLD                               | Pore limiting diameter (Å), PLD                               | Accessible Surface Area (m <sup>2</sup> /g), S <sub>acc</sub> |
| Accessible Surface Area (m <sup>2</sup> /g), S <sub>acc</sub> | Accessible Surface Area (m <sup>2</sup> /g), S <sub>acc</sub> | Porosity, φ                                                   |
| Porosity, φ                                                   | Porosity, φ                                                   | Heat of adsorption (kJ/mol), Q <sub>st</sub> <sup>0</sup>     |
| Density (g/cm <sup>3</sup> ), ρ                               | Density (g/cm <sup>3</sup> ), ρ                               | Carbon percentage, C%                                         |
|                                                               | Heat of adsorption (kJ/mol), Q <sub>st</sub> <sup>0</sup>     | Hydrogen percentage, H%                                       |
|                                                               | Carbon percentage, C%                                         | Nitrogen percentage, N%                                       |
|                                                               | Hydrogen percentage, H%                                       | Oxygen percentage, O%                                         |
|                                                               | Nitrogen percentage, N%                                       | Fluorine percentage, F%                                       |
|                                                               | Oxygen percentage, O%                                         | Sulfur percentage, S%                                         |
|                                                               | Fluorine percentage, F%                                       | Silicon percentage, Si%                                       |
|                                                               | Sulfur percentage, S%                                         |                                                               |
|                                                               | Silicon percentage, Si%                                       |                                                               |

**Table S3.** The quantities calculated to evaluate the model accuracies.

| Metric                                 | Formula                                                                                               |
|----------------------------------------|-------------------------------------------------------------------------------------------------------|
| Coefficient of Determination ( $R^2$ ) | $1 - \frac{\frac{1}{M} \sum_{m=1}^M (\bar{y} - \hat{y})^2}{\frac{1}{M} \sum_{m=1}^M (y - \hat{y})^2}$ |
| Mean Absolute Error (MAE)              | $\sum_{m=1}^M  y - \hat{y}  / M$                                                                      |
| Root Mean Square Error (RMSE)          | $\sqrt{\sum_{m=1}^M (y - \hat{y})^2 / M}$                                                             |

M: the number of samples, y: simulated value,  $\hat{y}$ : predicted value,  $\bar{y}$ : average of the simulated value

**Table S4.** The ML pipelines constructed by Group A descriptors and their parameters based on the gas adsorption properties of COFs at each adsorption condition.

| <b>Property</b>                      | <b>Best Pipeline with Parameters</b>                                                                                                                                                                                                                                                                                                                                                                                      |
|--------------------------------------|---------------------------------------------------------------------------------------------------------------------------------------------------------------------------------------------------------------------------------------------------------------------------------------------------------------------------------------------------------------------------------------------------------------------------|
| 10 bar, 298 K<br>(CH <sub>4</sub> )  | ExtraTreesRegressor(FastICA(PolynomialFeatures(input_matrix, degree=2, include_bias=False, interaction_only=False), tol=0.6000000000000001), bootstrap=False, max_features=0.45, min_samples_leaf=1, min_samples_split=13, n_estimators=100)                                                                                                                                                                              |
| 1 bar, 298 K<br>(CH <sub>4</sub> )   | ExtraTreesRegressor(PolynomialFeatures(MaxAbsScaler(input_matrix), degree=2, include_bias=False, interaction_only=False), bootstrap=False, max_features=0.45, min_samples_leaf=1, min_samples_split=4, n_estimators=100)                                                                                                                                                                                                  |
| 0.1 bar, 298 K<br>(CH <sub>4</sub> ) | RandomForestRegressor(ElasticNetCV(GradientBoostingRegressor(PCA(input_matrix, iterated_power=7, svd_solver=randomized), alpha=0.8, learning_rate=0.001, loss=quantile, max_depth=5, max_features=0.5, min_samples_leaf=15, min_samples_split=11, n_estimators=100, subsample=0.2), l1_ratio=0.25, tol=0.01), bootstrap=True, max_features=0.7000000000000001, min_samples_leaf=7, min_samples_split=8, n_estimators=100) |
| 10 bar, 298 K<br>(H <sub>2</sub> )   | XGBRegressor(LassoLarsCV(DecisionTreeRegressor(PolynomialFeatures(input_matrix, degree=2, include_bias=False, interaction_only=False), max_depth=2, min_samples_leaf=7, min_samples_split=18), normalize=False), learning_rate=0.1, max_depth=4, min_child_weight=10, n_estimators=100, n_jobs=1, objective=reg:squarederror, subsample=0.7500000000000001, verbosity=0)                                                  |
| 1 bar, 298 K<br>(H <sub>2</sub> )    | XGBRegressor(CombinedDFs(SelectFwe(input_matrix, alpha=0.045), PCA(input_matrix, iterated_power=10, svd_solver=randomized)), learning_rate=0.1, max_depth=9, min_child_weight=10, n_estimators=100, n_jobs=1, objective=reg:squarederror, subsample=0.7500000000000001, verbosity=0)                                                                                                                                      |

**Table S5.** The ML pipelines constructed by Group B descriptors and their parameters based on the gas adsorption properties of COFs at each adsorption condition.

| <b>Property</b>                      | <b>Best Pipeline with Parameters</b>                                                                                                                                                                                                                                                                            |
|--------------------------------------|-----------------------------------------------------------------------------------------------------------------------------------------------------------------------------------------------------------------------------------------------------------------------------------------------------------------|
| 10 bar, 298 K<br>(CH <sub>4</sub> )  | GradientBoostingRegressor(LassoLarsCV(input_matrix, normalize=False), alpha=0.8, learning_rate=0.1, loss=ls, max_depth=9, max_features=0.9000000000000001, min_samples_leaf=1, min_samples_split=5, n_estimators=100, subsample=0.8500000000000001)                                                             |
| 1 bar, 298 K<br>(CH <sub>4</sub> )   | ExtraTreesRegressor(CombineDFs(RidgeCV(input_matrix), input_matrix), bootstrap=False, max_features=0.9000000000000001, min_samples_leaf=2, min_samples_split=2, n_estimators=100)                                                                                                                               |
| 0.1 bar, 298 K<br>(CH <sub>4</sub> ) | XGBRegressor(RidgeCV(PCA(input_matrix, iterated_power=7, svd_solver=randomized)), learning_rate=0.1, max_depth=4, min_child_weight=7, n_estimators=100, n_jobs=1, objective=reg:squarederror, subsample=0.9000000000000001, verbosity=0)                                                                        |
| 10 bar, 298 K<br>(H <sub>2</sub> )   | LassoLarsCV(PolynomialFeatures(RobustScaler(input_matrix), degree=2, include_bias=False, interaction_only=False), normalize=False)                                                                                                                                                                              |
| 1 bar, 298 K<br>(H <sub>2</sub> )    | GradientBoostingRegressor(LassoLarsCV(PolynomialFeatures(input_matrix, degree=2, include_bias=False, interaction_only=False), normalize=False), alpha=0.8, learning_rate=0.1, loss=ls, max_depth=5, max_features=0.9000000000000001, min_samples_leaf=1, min_samples_split=9, n_estimators=100, subsample=0.25) |

**Table S6.** The ML pipelines constructed by Group C descriptors and their parameters based on the gas adsorption properties of COFs at each adsorption condition.

| <b>Property</b>                      | <b>Best Pipeline with Parameters</b>                                                                                                                                                                                                                                                                                                                                                                                                                                                                           |
|--------------------------------------|----------------------------------------------------------------------------------------------------------------------------------------------------------------------------------------------------------------------------------------------------------------------------------------------------------------------------------------------------------------------------------------------------------------------------------------------------------------------------------------------------------------|
| 10 bar, 298 K<br>(CH <sub>4</sub> )  | ExtraTreesRegressor(PolynomialFeatures(input_matrix, degree=2, include_bias=False, interaction_only=False), bootstrap=False, max_features=0.55, min_samples_leaf=1, min_samples_split=3, n_estimators=100)                                                                                                                                                                                                                                                                                                     |
| 1 bar, 298 K<br>(CH <sub>4</sub> )   | XGBRegressor(ExtraTreesRegressor(PolynomialFeatures(SGDRegressor(input_matrix, alpha=0.001, eta0=1.0, fit_intercept=False, l1_ratio=0.0, learning_rate=constant, loss=huber, penalty=elasticnet, power_t=0.5), degree=2, include_bias=False, interaction_only=False), bootstrap=False, max_features=0.8, min_samples_leaf=5, min_samples_split=17, n_estimators=100), learning_rate=0.5, max_depth=4, min_child_weight=14, n_estimators=100, n_jobs=1, objective=reg:squarederror, subsample=1.0, verbosity=0) |
| 0.1 bar, 298 K<br>(CH <sub>4</sub> ) | XGBRegressor(LassoLarsCV(input_matrix, normalize=False), learning_rate=0.1, max_depth=4, min_child_weight=14, n_estimators=100, n_jobs=1, objective=reg:squarederror, subsample=1.0, verbosity=0)                                                                                                                                                                                                                                                                                                              |
| 10 bar, 298 K<br>(H <sub>2</sub> )   | XGBRegressor(LassoLarsCV(SelectFwe(input_matrix, alpha=0.04), normalize=False), learning_rate=0.1, max_depth=8, min_child_weight=2, n_estimators=100, n_jobs=1, objective=reg:squarederror, subsample=0.6500000000000001, verbosity=0)                                                                                                                                                                                                                                                                         |
| 1 bar, 298 K<br>(H <sub>2</sub> )    | XGBRegressor(SGDRegressor(input_matrix, alpha=0.01, eta0=0.01, fit_intercept=True, l1_ratio=1.0, learning_rate=constant, loss=huber, penalty=elasticnet, power_t=0.0), learning_rate=0.1, max_depth=8, min_child_weight=2, n_estimators=100, n_jobs=1, objective=reg:squarederror, subsample=0.6500000000000001, verbosity=0)                                                                                                                                                                                  |

**Table S7.** Separation performances of the top 10 CoRE COFs for PSA process.

| ID  | Dimension | APS<br>(mol/kg) | $S_{\text{CH}_4/\text{H}_2}$ | R%   | LCD<br>(Å) | Density<br>(g/cm <sup>3</sup> ) | $\phi$ | $S_{\text{acc}}$<br>(m <sup>2</sup> /g) |
|-----|-----------|-----------------|------------------------------|------|------------|---------------------------------|--------|-----------------------------------------|
| 114 | 3D        | 129.1           | 28.1                         | 87.0 | 8.98       | 0.74                            | 0.63   | 2412.2                                  |
| 468 | 2D        | 117.9           | 27.2                         | 85.2 | 5.58       | 0.74                            | 0.63   | 2412.2                                  |
| 133 | 2D        | 81.2            | 30.0                         | 88.8 | 9.15       | 1.00                            | 0.69   | 2899.2                                  |
| 11  | 3D        | 79.6            | 14.2                         | 89.4 | 6.33       | 0.46                            | 0.72   | 3521.4                                  |
| 5   | 2D        | 77.8            | 27.1                         | 88.8 | 8.25       | 0.83                            | 0.68   | 3449.7                                  |
| 329 | 2D        | 75.7            | 16.2                         | 88.9 | 6.69       | 0.59                            | 0.68   | 3262.3                                  |
| 294 | 3D        | 71.3            | 17.0                         | 85.8 | 8.66       | 0.62                            | 0.56   | 2137.7                                  |
| 69  | 2D        | 68.3            | 25.9                         | 87.3 | 8.48       | 0.84                            | 0.56   | 1793.5                                  |
| 435 | 3D        | 67.0            | 13.0                         | 87.4 | 16.68      | 0.47                            | 0.60   | 2700.7                                  |
| 140 | 2D        | 65.6            | 13.4                         | 89.5 | 12.53      | 0.46                            | 0.68   | 3306.4                                  |



**Table S8.** Separation performances of the top 10 CoRE COFs for VSA process.

| ID  | Dimension | APS<br>(mol/kg) | $S_{\text{CH}_4/\text{H}_2}$ | R%   | LCD<br>(Å) | Density<br>(g/cm <sup>3</sup> ) | $\phi$ | $S_{\text{acc}}$<br>(m <sup>2</sup> /g) |
|-----|-----------|-----------------|------------------------------|------|------------|---------------------------------|--------|-----------------------------------------|
| 327 | 3D        | 180.6           | 105.4                        | 86.2 | 5.27       | 0.98                            | 0.54   | 1125.0                                  |
| 113 | 3D        | 113.2           | 136.0                        | 85.6 | 4.27       | 1.12                            | 0.43   | 280.3                                   |
| 328 | 3D        | 110.9           | 93.6                         | 86.9 | 6.15       | 1.05                            | 0.50   | 940.7                                   |
| 116 | 3D        | 78.9            | 108.7                        | 86.6 | 4.51       | 1.04                            | 0.46   | 425.1                                   |
| 414 | 2D        | 47.7            | 43.2                         | 86.8 | 14.93      | 0.87                            | 0.69   | 1495.8                                  |
| 193 | 2D        | 45.6            | 60.5                         | 87.4 | 6.74       | 1.03                            | 0.52   | 1045.3                                  |
| 76  | 3D        | 44.6            | 52.7                         | 88.1 | 5.66       | 0.89                            | 0.55   | 621.3                                   |
| 480 | 2D        | 38.8            | 72.1                         | 87.2 | 4.73       | 1.25                            | 0.44   | 548.6                                   |
| 380 | 2D        | 36.2            | 38.2                         | 87.8 | 7.34       | 0.70                            | 0.64   | 2401.2                                  |
| 431 | 2D        | 26.4            | 45.1                         | 88.2 | 6.89       | 0.91                            | 0.53   | 1142.0                                  |

**Table S9.** Separation performances of the top 10 hypoCOFs for PSA process.

| ID                                              | APS<br>(mol/kg) | S <sub>CH<sub>4</sub>/H<sub>2</sub></sub> | R%   | LCD<br>(Å) | Density<br>(g/cm <sup>3</sup> ) | ϕ    | S <sub>acc</sub><br>(m <sup>2</sup> /g) |
|-------------------------------------------------|-----------------|-------------------------------------------|------|------------|---------------------------------|------|-----------------------------------------|
| linker108_C_linker92_C_tbo_relaxed              | 205.4           | 28.7                                      | 86.9 | 15.14      | 0.61                            | 0.74 | 2813.0                                  |
| linker108_C_linker91_C_tbo_relaxed              | 181.4           | 26.6                                      | 86.5 | 15.44      | 0.64                            | 0.78 | 2533.2                                  |
| linker92_C_linker92_C_nod_relaxed               | 177.1           | 24.6                                      | 86.1 | 7.70       | 0.56                            | 0.78 | 4098.8                                  |
| linker92_C_linker92_C_eth_relaxed               | 166.4           | 21.9                                      | 88.8 | 9.71       | 0.53                            | 0.80 | 3869.6                                  |
| linker107_C_linker7_C_unc_relaxed               | 162.6           | 27.7                                      | 85.7 | 6.09       | 0.60                            | 0.61 | 3952.4                                  |
| linker110_C_linker87_C_unf_relaxed              | 159.6           | 24.1                                      | 87.4 | 10.19      | 0.55                            | 0.70 | 4663.4                                  |
| linker91_C_linker51_C_hcb_relaxed               | 150.6           | 25.4                                      | 86.4 | 7.14       | 0.62                            | 0.70 | 4294.7                                  |
| linker108_C_linker87_C_lvt_relaxed<br>_interp_2 | 150.2           | 23.2                                      | 85.0 | 10.07      | 0.58                            | 0.72 | 2944.6                                  |
| linker108_C_linker58_C_lvt_relaxed<br>_interp_2 | 147.6           | 22.6                                      | 87.0 | 10.13      | 0.60                            | 0.76 | 3209.6                                  |
| linker99_C_linker36_C_qtz_relaxed_<br>interp_2  | 146.8           | 21.9                                      | 87.4 | 8.36       | 0.53                            | 0.77 | 4497.8                                  |

**Table S10.** Separation performances of the top 10 hypoCOFs for VSA process.

| ID                                         | APS<br>(mol/kg) | S <sub>CH<sub>4</sub>/H<sub>2</sub></sub> | R%   | LCD<br>(Å) | Density<br>(g/cm <sup>3</sup> ) | ϕ    | S <sub>acc</sub><br>(m <sup>2</sup> /g) |
|--------------------------------------------|-----------------|-------------------------------------------|------|------------|---------------------------------|------|-----------------------------------------|
| linker92_C_linker92_C_bpi_relaxed          | 242.9           | 79.4                                      | 87.9 | 5.52       | 0.71                            | 0.74 | 3012.7                                  |
| linker110_C_linker100_C_pth_relaxed        | 234.0           | 112.2                                     | 86.3 | 4.92       | 0.92                            | 0.50 | 1266.9                                  |
| linker91_C_linker91_C_nof_relaxed_interp_2 | 232.1           | 128.6                                     | 85.2 | 5.65       | 1.13                            | 0.39 | 719.7                                   |
| linker108_C_linker100_C_pts_relaxed        | 182.1           | 85.6                                      | 87.5 | 5.88       | 0.83                            | 0.60 | 1803.8                                  |
| linker100_C_linker108_C_pts_relaxed        | 176.5           | 83.7                                      | 87.7 | 5.88       | 0.83                            | 0.60 | 1803.8                                  |
| linker92_C_linker92_C_utg_relaxed          | 170.0           | 66.0                                      | 89.2 | 5.16       | 0.69                            | 0.71 | 3416.4                                  |
| linker92_C_linker92_C_bpe_relaxed          | 169.1           | 82.2                                      | 85.9 | 5.45       | 0.79                            | 0.60 | 1382.6                                  |
| linker92_C_linker92_C_bpc_relaxed          | 151.8           | 64.7                                      | 88.2 | 6.49       | 0.70                            | 0.71 | 2619.6                                  |
| linker100_C_linker102_C_cda_relaxed        | 149.6           | 92.3                                      | 85.6 | 6.60       | 0.87                            | 0.47 | 1301.0                                  |
| linker110_C_linker87_C_mdf_relaxed         | 149.0           | 119.0                                     | 85.5 | 6.04       | 0.96                            | 0.25 | 588.8                                   |

**Table S11.** The correlations between ML-predicted and simulated values of training and test sets for given models and conditions.  $R^2$  is a unitless number between 0 and 1, as both MAE and RMSE have units of mol/kg.

| Model                          | Train Set                                    | Test Set                                     |
|--------------------------------|----------------------------------------------|----------------------------------------------|
| A - CH <sub>4</sub> at 10 bar  | R <sup>2</sup> :0.866, MAE:0.285, RMSE:0.371 | R <sup>2</sup> :0.627, MAE:0.477, RMSE:0.621 |
| A - CH <sub>4</sub> at 1 bar   | R <sup>2</sup> :0.984, MAE:0.016, RMSE:0.029 | R <sup>2</sup> :0.617, MAE:0.096, RMSE:0.149 |
| A - CH <sub>4</sub> at 0.1 bar | R <sup>2</sup> :0.682, MAE:0.010, RMSE:0.018 | R <sup>2</sup> :0.464, MAE:0.013, RMSE:0.026 |
| A - H <sub>2</sub> at 10 bar   | R <sup>2</sup> :0.993, MAE:0.006, RMSE:0.009 | R <sup>2</sup> :0.991, MAE:0.007, RMSE:0.010 |
| A - H <sub>2</sub> at 1 bar    | R <sup>2</sup> :0.984, MAE:0.001, RMSE:0.001 | R <sup>2</sup> :0.971, MAE:0.001, RMSE:0.002 |
| B - CH <sub>4</sub> at 10 bar  | R <sup>2</sup> :0.994, MAE:0.061, RMSE:0.079 | R <sup>2</sup> :0.870 MAE:0.232, RMSE:0.367  |
| B - CH <sub>4</sub> at 1 bar   | R <sup>2</sup> :0.992, MAE:0.008, RMSE:0.020 | R <sup>2</sup> :0.885, MAE:0.037, RMSE:0.082 |
| B - CH <sub>4</sub> at 0.1 bar | R <sup>2</sup> :0.964, MAE:0.004, RMSE:0.006 | R <sup>2</sup> :0.841, MAE:0.005, RMSE:0.014 |
| B - H <sub>2</sub> at 10 bar   | R <sup>2</sup> :0.992, MAE:0.006, RMSE:0.009 | R <sup>2</sup> :0.993, MAE:0.006, RMSE:0.009 |
| B - H <sub>2</sub> at 1 bar    | R <sup>2</sup> :0.994, MAE:0.001, RMSE:0.001 | R <sup>2</sup> :0.990, MAE:0.001, RMSE:0.001 |
| C - CH <sub>4</sub> at 10 bar  | R <sup>2</sup> :0.999, MAE:0.014, RMSE:0.027 | R <sup>2</sup> :0.829, MAE:0.290, RMSE:0.421 |
| C - CH <sub>4</sub> at 1 bar   | R <sup>2</sup> :0.992, MAE:0.015, RMSE:0.020 | R <sup>2</sup> :0.856, MAE:0.047, RMSE:0.091 |
| C - CH <sub>4</sub> at 0.1 bar | R <sup>2</sup> :0.931, MAE:0.005, RMSE:0.008 | R <sup>2</sup> :0.801, MAE:0.006, RMSE:0.016 |
| C - H <sub>2</sub> at 10 bar   | R <sup>2</sup> :0.995, MAE:0.005, RMSE:0.007 | R <sup>2</sup> :0.979, MAE:0.011, RMSE:0.015 |
| C - H <sub>2</sub> at 1 bar    | R <sup>2</sup> :0.987, MAE:0.001, RMSE:0.001 | R <sup>2</sup> :0.969, MAE:0.001 RMSE:0.001  |

**Table S12.** The extended ML pipelines constructed by Group C descriptors and their parameters based on the gas adsorption properties of COFs at each adsorption condition.

| <b>Property</b>                      | <b>Best Pipeline with Parameters</b>                                                                                                                                                                                                                                                                                                                                                                                                                               |
|--------------------------------------|--------------------------------------------------------------------------------------------------------------------------------------------------------------------------------------------------------------------------------------------------------------------------------------------------------------------------------------------------------------------------------------------------------------------------------------------------------------------|
| 10 bar, 298 K<br>(CH <sub>4</sub> )  | RandomForestRegressor(RandomForestRegressor(ExtraTreesRegressor(ZeroCount(PolynomialFeatures(input_matrix, degree=2, include_bias=False, interaction_only=False))), bootstrap=False, max_features=0.8, min_samples_leaf=5, min_samples_split=17, n_estimators=100), bootstrap=False, max_features=0.2, min_samples_leaf=20, min_samples_split=20, n_estimators=100), bootstrap=False, max_features=0.2, min_samples_leaf=6, min_samples_split=4, n_estimators=100) |
| 1 bar, 298 K<br>(CH <sub>4</sub> )   | ExtraTreesRegressor(LassoLarsCV(PolynomialFeatures(input_matrix, degree=2, include_bias=False, interaction_only=False), normalize=False), bootstrap=False, max_features=0.55, min_samples_leaf=1, min_samples_split=16, n_estimators=100)                                                                                                                                                                                                                          |
| 0.1 bar, 298 K<br>(CH <sub>4</sub> ) | ExtraTreesRegressor(MaxAbsScaler(PolynomialFeatures(input_matrix, degree=2, include_bias=False, interaction_only=False))), bootstrap=False, max_features=0.9500000000000001, min_samples_leaf=3, min_samples_split=4, n_estimators=100)                                                                                                                                                                                                                            |
| 10 bar, 298 K<br>(H <sub>2</sub> )   | ExtraTreesRegressor(input_matrix, bootstrap=False, max_features=0.9500000000000001, min_samples_leaf=1, min_samples_split=4, n_estimators=100)                                                                                                                                                                                                                                                                                                                     |
| 1 bar, 298 K<br>(H <sub>2</sub> )    | ExtraTreesRegressor(input_matrix, bootstrap=False, max_features=0.9500000000000001, min_samples_leaf=1, min_samples_split=4, n_estimators=100)                                                                                                                                                                                                                                                                                                                     |
